# Supplementary material
Source: Springer Nature journal article supplement (https://www.springermedizin.de/resource/supplementary/12943_2008_353_MOESM2_ESM.pdf/9553994)
Supplement: MOESM2 [file 9553994]

Sample ID

JGS04  
JGS05  
JGS06  
JGS07  
JGS08  
JGS09  
JGS10  
JGS12  
JGS13  
JGS14  
JGS15  
JGS16  
JGS17  
JGS18  
JGS19  
JGS20  
JGS21  
JGS22  
JGS23  
JGS24  
JGS25  
JGS26  
JGS27  
JGS28  
JGS30  
JGS31  
JGS32  
JGS33  
JGS34  
JGS35  
JGS36  
JGS37  
JGS38  
JGS41  
JGS42  
JGS44  
JGS45  
JGS46  
JGS48  
JGS49  
JGS50  
JGS51  
JTL 24T  
JTL 37T  
STAD6T

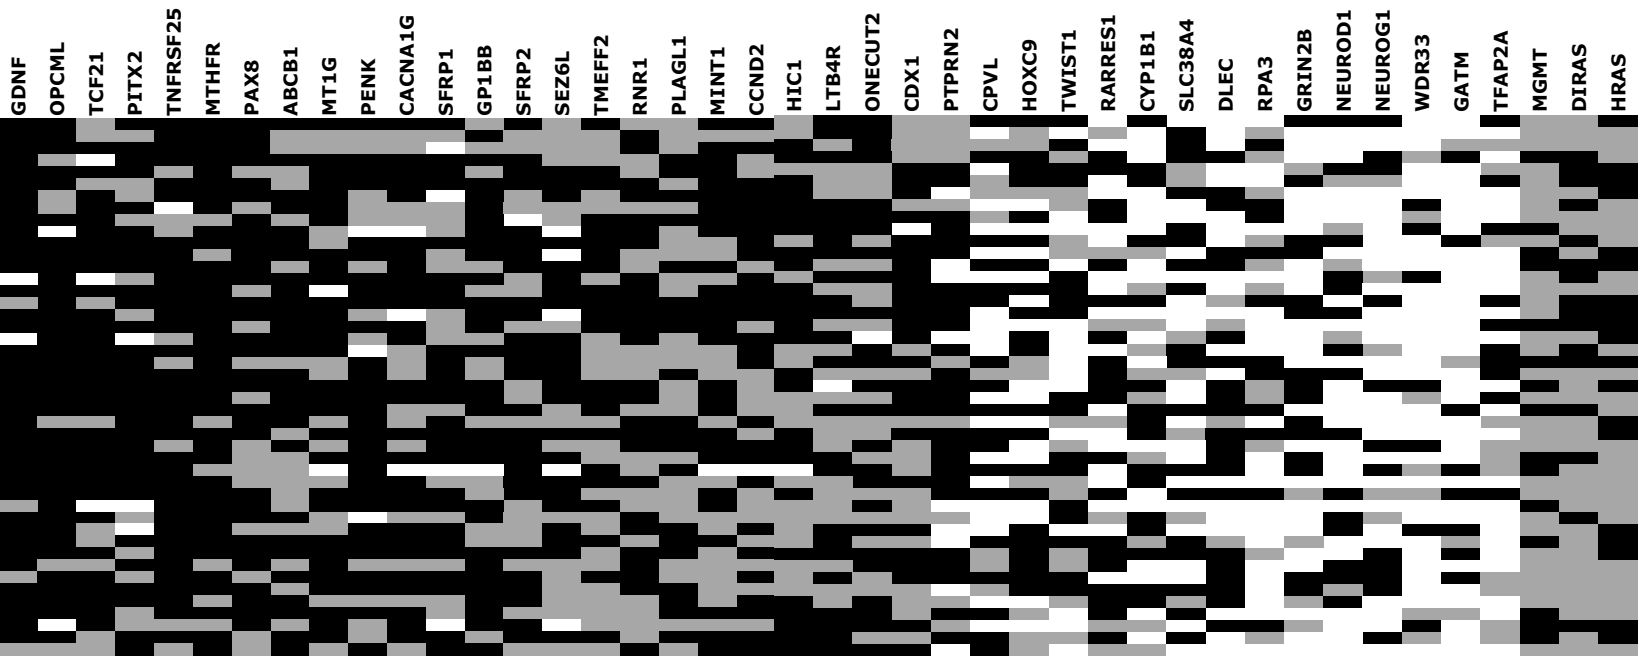

JGSN04  
JGSN05  
JGSN06  
JGSN07  
JGSN08  
JGSN09  
JGSN10  
JGSN12  
JGSN13  
JGSN14  
JGSN15  
JGSN16  
JGSN17  
JGSN18  
JGSN19  
JGSN20  
JGSN21  
JGSN22  
JGSN23  
JGSN24  
JGSN25  
JGSN26  
JGSN27  
JGSN28  
JGSN30  
JGSN31  
JGSN32  
JGSN33  
JGSN34  
JGSN35  
JGSN36  
JGSN37  
JGSN38  
JGSN41  
JGSN42  
JGSN44  
JGSN45  
JGSN46  
JGSN48  
JGSN49  
JGSN50  
JGSN51  
JTL 24N  
JTL 37N  
STAD6N

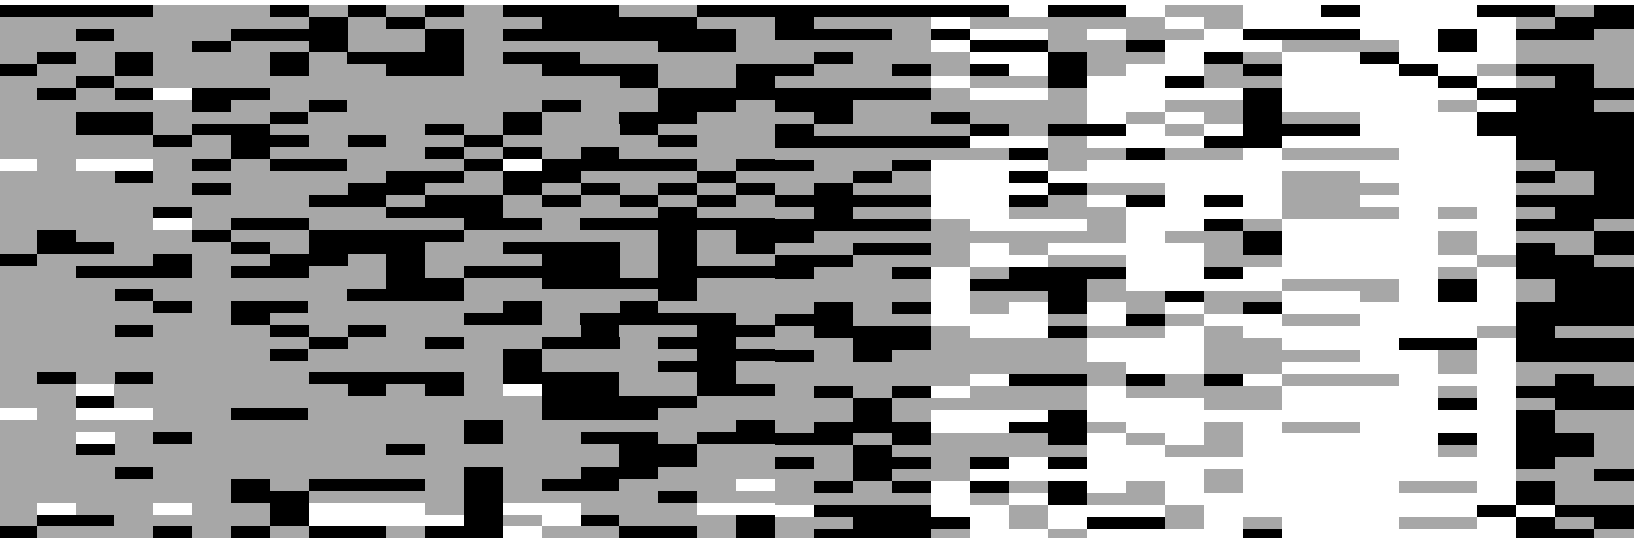

  $\geq$  Median PMR      $<$  Median PMR     No detectable Methylation
